# Supplementary material
Source: ML conference proceedings conference paper supplement (https://openaccess.thecvf.com/content/CVPR2021/html/Duan_EventZoom_Learning_To_CVPR_2021_paper.html)
Supplement: Supplementary file 2 [file Duan_EventZoom_Learning_To_CVPR_2021_supplemental.zip]

Archive with 2 entries (2 files):
- 01539_supp.pdf
- 01539_supp.mp4
